## Correction: Addressing the Global Neglect of Childhood Hearing Impairment in Developing Countries

Bolajoko O. Olusanya

In *PLoS Medicine*, volume 4, issue 4, doi:10.1371/journal.pmed.0040074:

The author inadvertently omitted the following citation that addresses the same topic (at the time of publication of the *PLoS Medicine* article, the article in *The Lancet* was still in press):

Olusanya BO, Newton VE (2007) Global burden of childhood hearing impairment and disease control priorities for developing countries. *Lancet* 369: 1314–1317.

The author did, however, cite this *Lancet* paper, as reference [10], in an earlier Correspondence article published in *PLoS Medicine*: Olusanya BO (2007) "The Right Stuff": The Global Burden of Disease. *PLoS Med* 4(2): e84. doi:10.1371/journal.pmed.0040084

This correction note may be found online at doi:10.1371/journal.pmed.0040203.

Published June 26, 2007.

Citation: (2007) Correction: Addressing the Global Neglect of Childhood Hearing Impairment in Developing Countries. *PLoS Med* 4(6): e203. doi:10.1371/journal.pmed.0040203

## Correction: Migrating Ovaries: Early Life Influences on Later Gonadal Function

Peter D. Gluckman, Alan S. Beedle

In *PLoS Medicine*, volume 4, issue 5, doi:10.1371/journal.pmed.0040190:

Reference 22 was truncated. The full reference should be:

22. Barker DJ, Osmond C, Forsen TJ, Kajantie E, Eriksson JG (2005) Trajectories of growth among children who have coronary events as adults. *N Engl J Med* 353: 1802–1809.

This correction note may be found online at doi:10.1371/journal.pmed.0040226.

Published June 26, 2007.

Citation: (2007) Correction: Migrating Ovaries: Early Life Influences on Later Gonadal Function. *PLoS Med* 4(6): e226. doi:10.1371/journal.pmed.0040226

## Correction: Prevalence and Causes of Blindness and Low Vision in Southern Sudan

Jeremiah Ngondi, Francis Ole-Sempele, Alice Onsarigo, Ibrahim Matende, Samson Baba, Mark Reacher, Fiona Matthews, Carol Brayne, Paul M. Emerson

In *PLoS Medicine*, volume 3, issue 12, doi:10.1371/journal.pmed.0030477:

In the Methods and Findings section of the Abstract, the figures 18/60 in the following sentence are incorrect and should read 6/18 to be consistent with what is in the main text of the article:

"Prevalence of blindness (presenting VA of less than 3/60 in the better eye) was 4.1% (95% confidence interval [CI], 3.4–4.8); prevalence of low vision (presenting VA of at least 3/60 but less than 18/60 in the better eye) was 7.7% (95% CI, 6.7–8.7); whereas prevalence of monocular visual impairment (presenting VA of at least 18/60 in better eye and VA of less than 18/60 in other eye) was 4.4% (95% CI, 3.6–5.3)."

Please note that this error does not change the data or the conclusions in the paper. It is an error in the abstract only.

This correction note may be found online at doi:10.1371/journal.pmed.0040227.

Published June 26, 2007.

Citation: (2007) Correction: Prevalence and Causes of Blindness and Low Vision in Southern Sudan. *PLoS Med* 4(6): e227. doi:10.1371/journal.pmed.0040227
